# Supplementary material for: Epigenetic identification of mitogen-activated protein kinase 10 as a functional tumor suppressor and clinical significance for hepatocellular carcinoma
Source: PeerJ journal article supplement (doi:10.7717/peerj.10810), 2021-02-02
Supplement: Original_Blots.zip [file Original_Blots.zip]

# MAPK10 — RT PCR and MSP 24/11/2010 (45)

primers:

RT-PCR:  $\left\{ \begin{array}{l} F3 - F11 \\ R3 - F12 \end{array} \right.$   $\left\{ \begin{array}{l} GAPDH33 - 3334 \\ GAPDH55 - 3335 \end{array} \right.$

MSP:  $\left\{ \begin{array}{l} m_1 - G03 \\ m_2 - G04 \end{array} \right.$   $\left\{ \begin{array}{l} U_1 - G05 \\ U_2 - G06 \end{array} \right.$

samples:

- ① Hep3B
- ② Hep3B (A+T)
- ③ HepG2
- ④ HepG2 (A+T)
- ⑤ SNU387
- ⑥ SNU387 (A+T)
- ⑦ positive (normal liver for RT PCR. Ycc-B<sub>1</sub> for msp)
- ⑧ -ve

RT-PCR:

55°C 32 cycles (GAPDH: 55°C 23 cycles)

RT-PCR using Promega GoTaq

July 16, 2007/CUHK/Tao

|    | 95°C/2', 32 cycles<br>(95°C/30'', °C/30'',<br>72°C/30''), 72°C/3' | For 50 µl    | For 12.5 µl    |       | Final concentrat.  |
|----|-------------------------------------------------------------------|--------------|----------------|-------|--------------------|
|    |                                                                   |              |                | x 8   |                    |
| 1: | 5 x Flexi buffer                                                  | 8 µl         | 2 µl           | 16    | 0.8x               |
| 2: | 5' primer (10µM)                                                  | 3 µl         | 0.75 µl        | 6     | 0.6 µM             |
| 3: | 3' primer (10µM)                                                  | 3 µl         | 0.75 µl        | 6     | 0.6 µM             |
| 4: | Promega GoTaq (5U/µl)                                             | 0.25 µl      | 0.0625 µl      | 0.5   | 1.25U/50 µl        |
| 5: | RT product                                                        | 10 µl        | 2.5 µl         | → 0.5 | about 0.5 µg/50 µl |
| 6: | MgCl <sub>2</sub> (25 mM)                                         | 2 µl         | 0.5 µl         | 4     | 2 mM               |
| 7: | dd H <sub>2</sub> O                                               | 23.75 µl     | 5.9375 µl      | 47.5  |                    |
|    | <b>Total volume</b>                                               | <b>50 µl</b> | <b>12.5 µl</b> |       |                    |

MSP: m: 60°C 40 cycles U: 58°C 40 cycles

MSP for cell lines (using less Taq-Gold/1x) (since July 06') July 26, 2006, Tao/CEL/CUHK

|    | 95°C/10 min, 40 cycles (94°C/30'',<br>°C/30'', 72°C/30''), 72°C/5 min | For 25 µl<br>reaction | 12.5 µl | x 8   | Final Conc.       |
|----|-----------------------------------------------------------------------|-----------------------|---------|-------|-------------------|
| 1: | 10 x PCR buffer II (PE)                                               | 2.5 µl                | 1.25    | 10    | 1x                |
| 2: | 25mM MgCl <sub>2</sub> (PE)                                           | 2 µl                  | 1       | 8     | 2 mM              |
| 3: | dNTP (2.5mM each)                                                     | 2 µl                  | 1       | 8     | 0.2 mM            |
| 4: | 5' primer (10µM)                                                      | 1.5 µl                | 0.75    | 6     | 0.6 µM            |
| 5: | 3' primer (10µM)                                                      | 1.5 µl                | 0.75    | 6     | 0.6 µM            |
| 6: | Taq-Gold (5U/µl) (PE)                                                 | 0.125 µl              | 0.0625  | 0.5   | 1.25U / 50µl (1x) |
| 7: | dd H <sub>2</sub> O                                                   | 14.375 µl             | 7.1875  | 57.5  |                   |
| 8: | *Bisulfited DNA*                                                      | 1 µl                  | 0.5     | → 0.5 | 0.1µg/100µl       |
|    | <b>Total:</b>                                                         | <b>25 µl</b>          |         |       |                   |
