# Supplementary material for: Epigenetic identification of mitogen-activated protein kinase 10 as a functional tumor suppressor and clinical significance for hepatocellular carcinoma
Source: PeerJ journal article supplement (doi:10.7717/peerj.10810), 2021-02-02
Supplement: Original_Blots.zip [file Original_Blots.zip]

21

MAPK 10

RT PCR for MAPK 10 c cell lines (and A17)

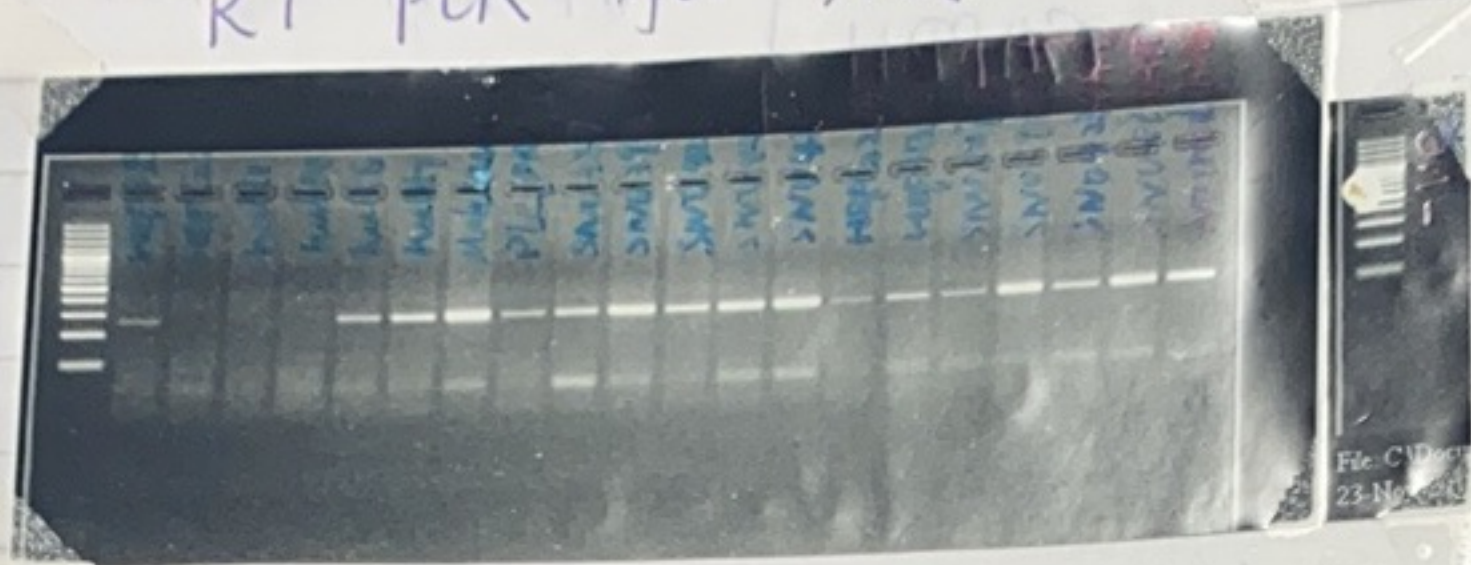

55°C 32 cycles  
2% Gel

RT PCR for GAPDH

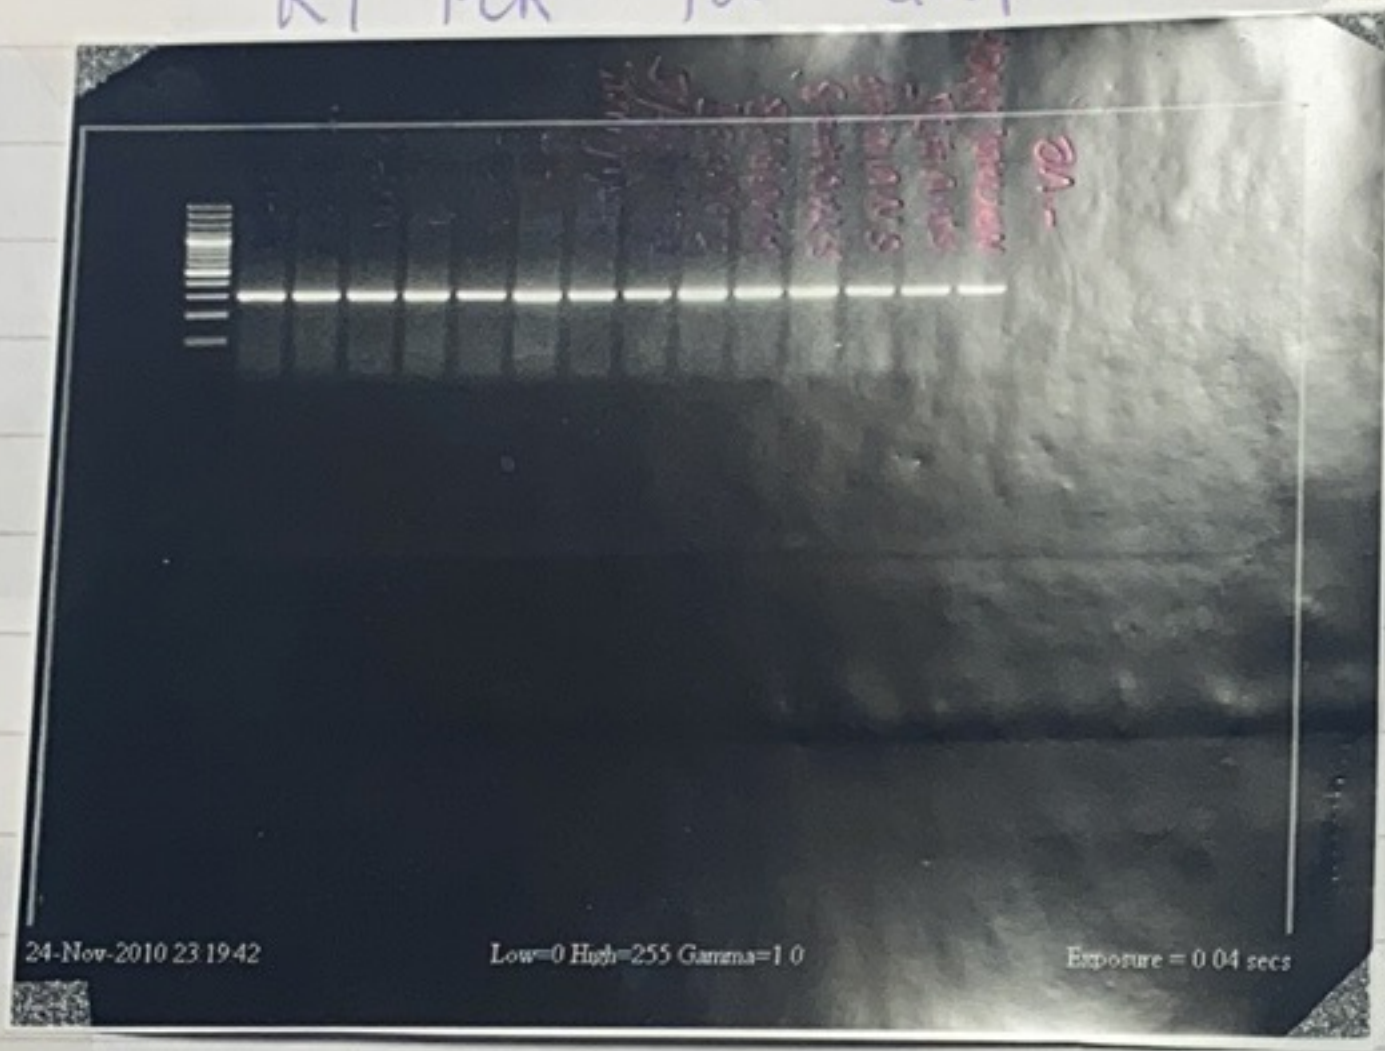

55°C 23 cycles  
2% Gel

m

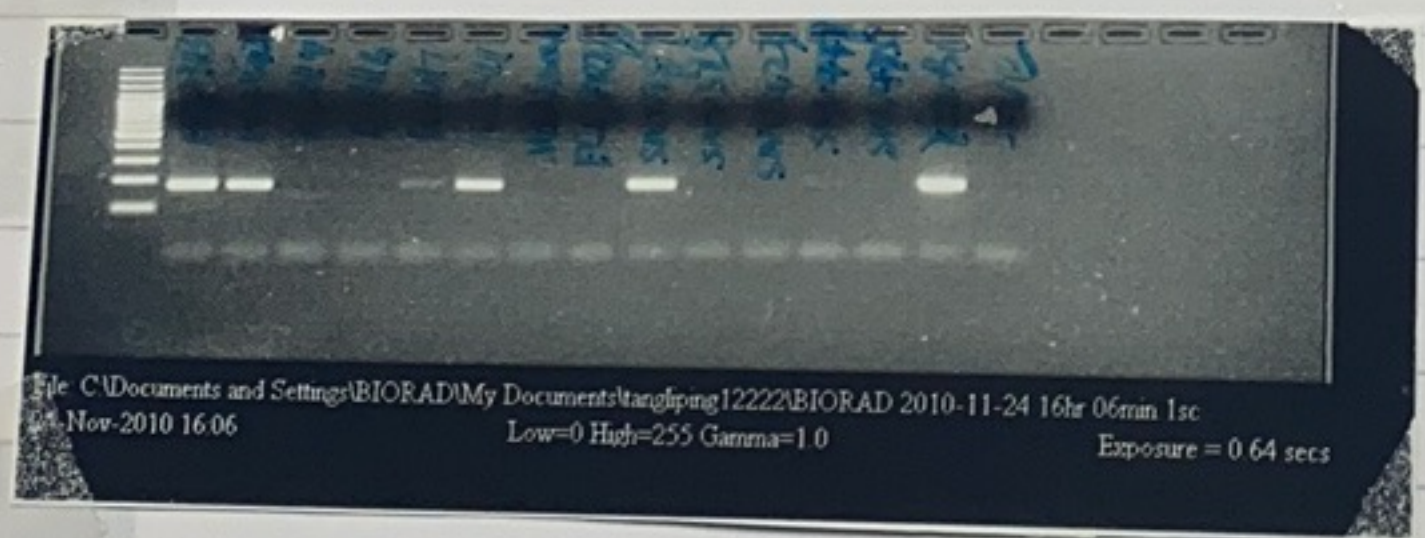

58°C 40 cycles  
2% Gel

U

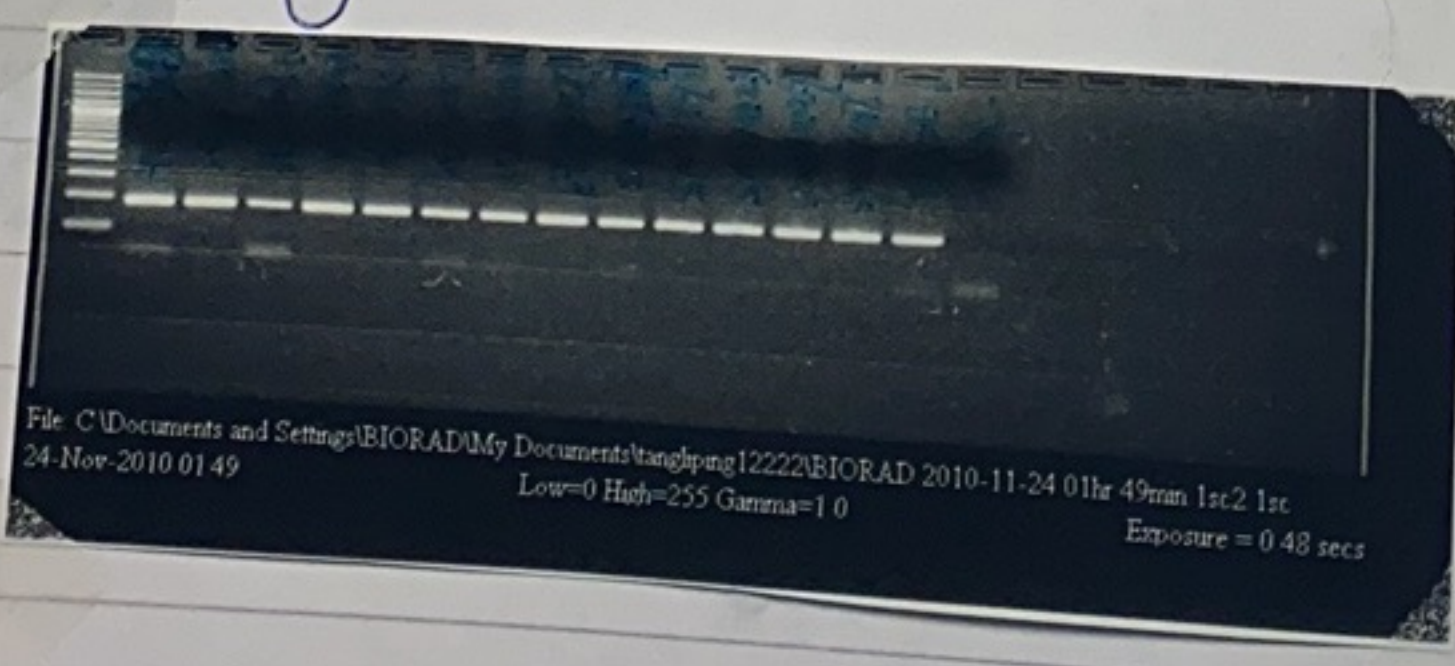

58°C 40 cycles  
2% Gel

times:

RT-PCR  
(for MAPK)

msp:

samples

RT-PCR

|    |       |
|----|-------|
|    | 95°C  |
|    | (95°C |
|    | 72°C  |
| 1: |       |
| 2: |       |
| 3: |       |
| 4: | Pr    |
| 5: |       |
| 6: |       |
| 7: |       |

msp

|    |   |
|----|---|
| M  | 9 |
| 1: |   |
| 2: |   |
| 3: |   |
| 4: |   |
| 5: |   |
| 6: |   |
| 7: |   |
| 8: |   |
