# Supplementary material for: Epigenetic identification of mitogen-activated protein kinase 10 as a functional tumor suppressor and clinical significance for hepatocellular carcinoma
Source: PeerJ journal article supplement (doi:10.7717/peerj.10810), 2021-02-02
Supplement: Original_Blots.zip [file Original_Blots.zip]

The original western blot images

Hep3B HepG2

Vector MAPK10（1） MAPK10（2） Vector MAPK10

makp10


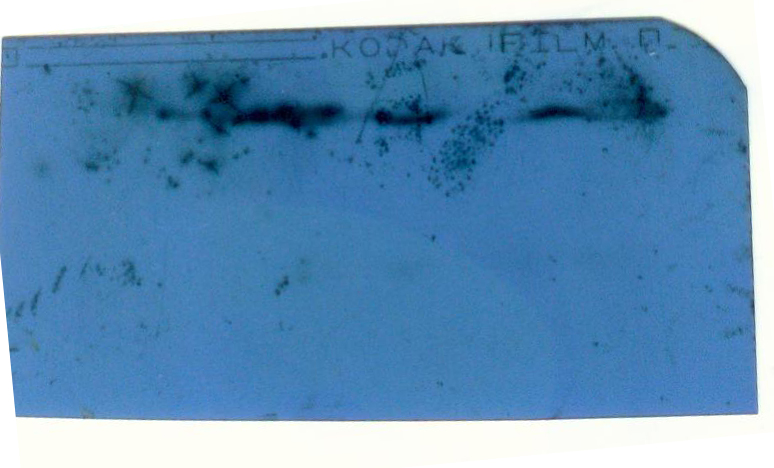


p53


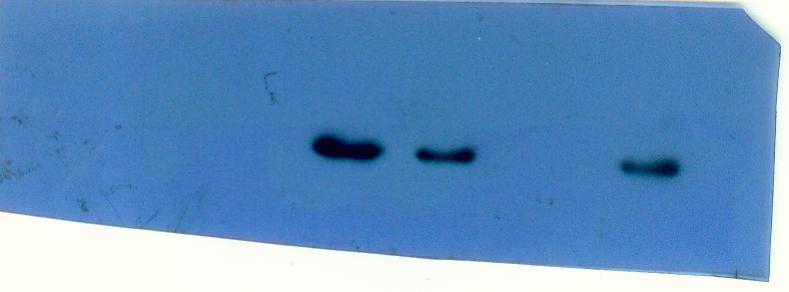


p-p53


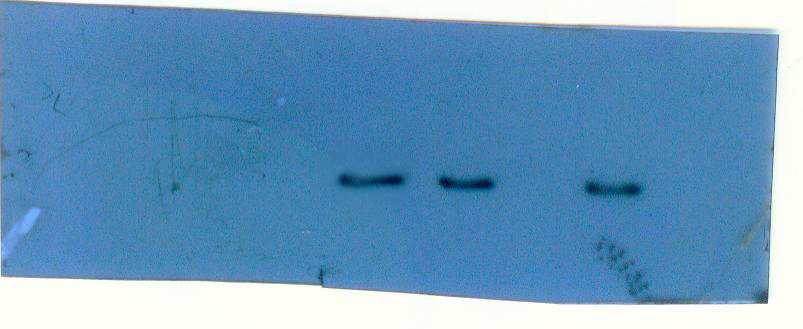


GAPDH


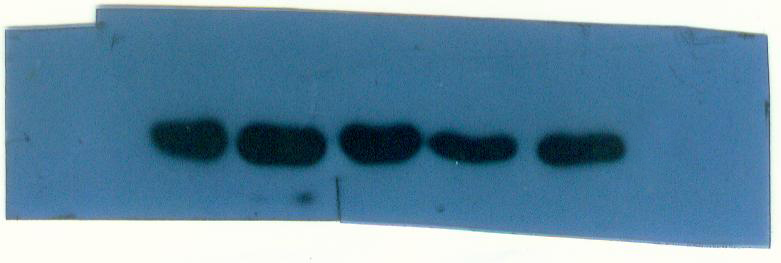


The red boxs are the Hep3B group and the blue boxs are the HepG2 group.
