# Supplementary material for: Epigenetic identification of mitogen-activated protein kinase 10 as a functional tumor suppressor and clinical significance for hepatocellular carcinoma
Source: PeerJ journal article supplement (doi:10.7717/peerj.10810), 2021-02-02
Supplement: Original_Blots.zip [file Original_Blots.zip]

# MAPK10 — Msp

MAPK10

Msp

(A+T)

22/11/2016

(44)

primers:

m { G03 (plate 7) — m<sub>1</sub>  
G04 (plate 7) — m<sub>2</sub>

U { G05 (plate 7) — U<sub>1</sub>  
G06 (plate 7) — U<sub>2</sub>

samples:

- ① Hep3B
- ② Hep3B (A+T)
- ③ HepG2
- ④ HepG2 (A+T)
- ⑤ SNU387
- ⑥ SNU387 (A+T)
- ⑦ positive: Yec-B1
- ⑧ -ve

m: 60°C 40 cycles

U: 58°C 40 cycles

2% Gel. 2.5% subson safe

150V 1min

130V 18min

MAPK10.

RT-PCR.

全部肝细胞的 13个

加上全部的 A+T 的

一起作。

阳性对照为: normal liver

MAPK10.

MSP.

GAPDH

的引物操作。

RT-PCR

MSP for cell lines (using less Taq-Gold/1x) (since July 06') July 26, 2006, Tao/CEL/CUHK

| 95°C/10 min, 40 cycles (94°C/30",<br>°C/30", 72°C/30"), 72°C/5 min | For 25 µl<br>reaction | Final Conc.       |
|--------------------------------------------------------------------|-----------------------|-------------------|
| 10 x PCR buffer II (PE)                                            | 2.5 µl                | 1x                |
| 25mM MgCl <sub>2</sub> (PE)                                        | 2 µl                  | 2 mM              |
| dNTP (2.5mM each)                                                  | 2 µl                  | 0.2 mM            |
| 5' primer (10µM)                                                   | 1.5 µl                | 0.6 µM            |
| 3' primer (10µM)                                                   | 1.5 µl                | 0.6 µM            |
| Taq-Gold (5U/µl) (PE)                                              | 0.125 µl              | 1.25U / 50µl (1x) |
| dd H <sub>2</sub> O                                                | 14.375 µl             |                   |
| *Bisulfited DNA*                                                   | 1 µl                  | 0.1µg / 100µl     |
| Total:                                                             | 25 µl                 |                   |

\*(For DNA samples bisulfited before 3/2003', use 0.5ul/25ul; for DNA samples bisulfited after 3/2003', use 1ul/25ul)
