# Supplementary material for: Epigenetic identification of mitogen-activated protein kinase 10 as a functional tumor suppressor and clinical significance for hepatocellular carcinoma
Source: PeerJ journal article supplement (doi:10.7717/peerj.10810), 2021-02-02
Supplement: Original_Blots.zip [file Original_Blots.zip]

# MAPK10 - RT PCR and MSP

(cell lines)

Nov. → 6. 2010 (46)

primers:

RT-PCR: (for MAPK10)  $\left\{ \begin{array}{l} F_3 - F_{11} \\ R_3 - F_{12} \end{array} \right\} 248 \text{ bp}$  GAPDH  $\left\{ \begin{array}{l} F_{3334} - GAPDH_{33} \\ R_{335} - 3335 - GAPDH_{55} \end{array} \right\}$

MSP:  $m \left\{ \begin{array}{l} m_1 - G_{03} \\ m_2 - G_{04} \end{array} \right\} 160 \text{ bp}$   $U \left\{ \begin{array}{l} U_1 - G_{05} \\ U_2 - G_{06} \end{array} \right\} 163 \text{ bp}$

Samples: ① Hep3B ② HepG2 ③ huiH<sub>1</sub> ④ huiH<sub>4</sub> ⑤ huiH<sub>6</sub>  
⑥ huiH<sub>7</sub> ⑦ Mahlavu ⑧ PLC/PRF/5 ⑨ SNU387  
⑩ SNU398 ⑪ SNU423 ⑫ SNU449 ⑬ SNU475  
⑭ normal control: normal liver for RT-PCR  
YCC-B<sub>1</sub> for MSP  
⑮ negative control (-ve)

## RT-PCR

55°C 32 cycles (for GAPDH 23 cycles)

### RT-PCR using Promega GoTaq

July 16, 2007/CUHK/Tao

|    | 95°C/2', 32 cycles<br>(95°C/30'', °C/30'',<br>72°C/30''), 72°C/3' | For 50 µl | For 12.5 µl | x 16  | Final concentrat.  |
|----|-------------------------------------------------------------------|-----------|-------------|-------|--------------------|
| 1: | 5 x Flexi buffer                                                  | 8 µl      | 2 µl        | 32    | 0.8x               |
| 2: | 5' primer (10µM)                                                  | 3 µl      | 0.75 µl     | 12    | 0.6 µM             |
| 3: | 3' primer (10µM)                                                  | 3 µl      | 0.75 µl     | 12    | 0.6 µM             |
| 4: | Promega GoTaq (5U/µl)                                             | 0.25 µl   | 0.0625 µl   | 1     | 1.25U/50 µl        |
| 5: | RT product                                                        | 10 µl     | 2.5 µl      | → 2.5 | about 0.5 µg/50 µl |
| 6: | MgCl <sub>2</sub> (25 mM)                                         | 2 µl      | 0.5 µl      | 8     | 2 mM               |
| 7: | dd H <sub>2</sub> O                                               | 23.75 µl  | 5.9375 µl   | 95    |                    |
|    | Total volume                                                      | 50 µl     | 12.5 µl     |       |                    |

(For GAPDH, use 23 cycles)

## MSP

m: 58°C 40 cycles

U: 58°C 40 cycles

### MSP for cell lines (using less Taq-Gold/1x) (since July 06')

July 26, 2006, Tao/CEL/CUHK

|    | 95°C/10 min, 40 cycles (94°C/30'',<br>°C/30'', 72°C/30''), 72°C/5 min | For 25 µl<br>reaction | 12.5 µl | 16    | 20 | Final Conc.       |
|----|-----------------------------------------------------------------------|-----------------------|---------|-------|----|-------------------|
| 1: | 10 x PCR buffer II (PE)                                               | 2.5 µl                | 1.25    | 20    |    | 1x                |
| 2: | 25mM MgCl <sub>2</sub> (PE)                                           | 2 µl                  | 1       | 16    |    | 2 mM              |
| 3: | dNTP (2.5mM each)                                                     | 2 µl                  | 1       | 16    |    | 0.2 mM            |
| 4: | 5' primer (10µM)                                                      | 1.5 µl                | 0.75    | 12    |    | 0.6 µM            |
| 5: | 3' primer (10µM)                                                      | 1.5 µl                | 0.75    | 12    |    | 0.6 µM            |
| 6: | Taq-Gold (5U/µl) (PE)                                                 | 0.125 µl              | 0.0625  | 1     |    | 1.25U / 50µl (1x) |
| 7: | dd H <sub>2</sub> O                                                   | 14.375 µl             | 7.1875  | 115   |    |                   |
| 8: | *Bisulfited DNA*                                                      | 1 µl                  | 0.5     | → 0.5 |    | 0.1 µg / 100µl    |
|    | Total:                                                                | 25 µl                 |         |       |    |                   |

\*(For DNA samples bisulfited before 3/2003', use 0.5ul/25ul; for DNA samples bisulfited after 3/2003', use 1ul/25ul)

28 Gel

① 150 V 1 min

② 130 V 18 min
