# Supplementary figures and images for: Epigenetic identification of mitogen-activated protein kinase 10 as a functional tumor suppressor and clinical significance for hepatocellular carcinoma
Source: PeerJ journal article supplement (doi:10.7717/peerj.10810), 2021-02-02

MARK 10

RT-PCR for MAPK 10

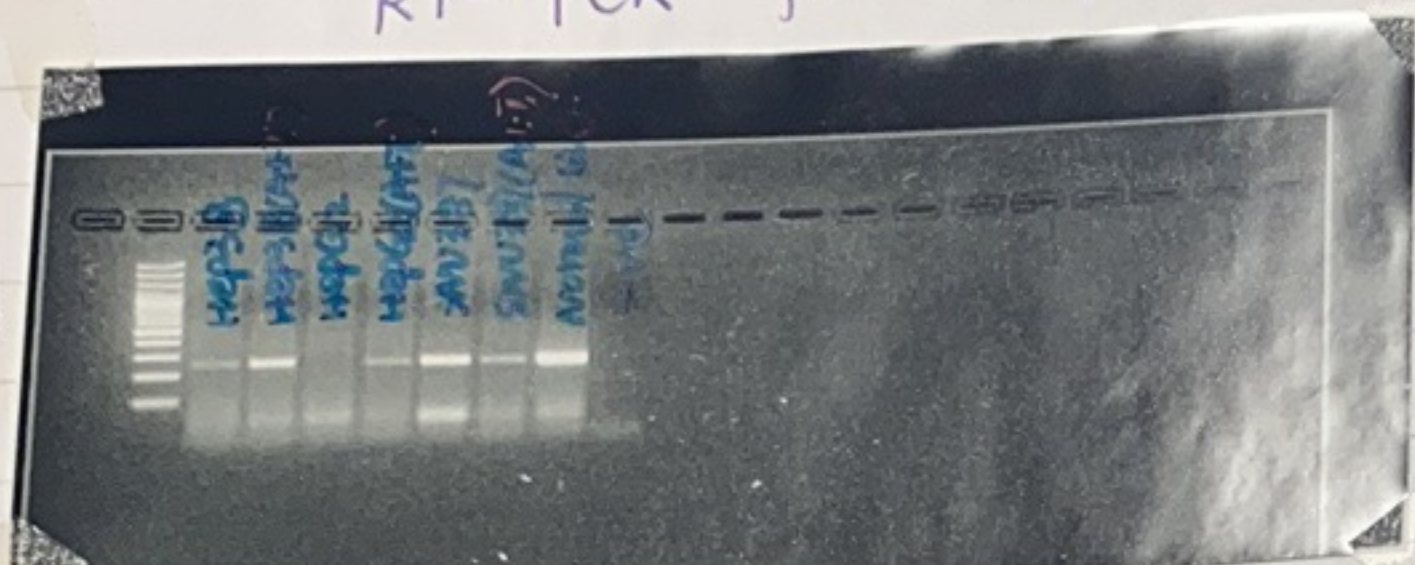

55°C      32 cycles  
2% crel

RT-PCR for GAPDH

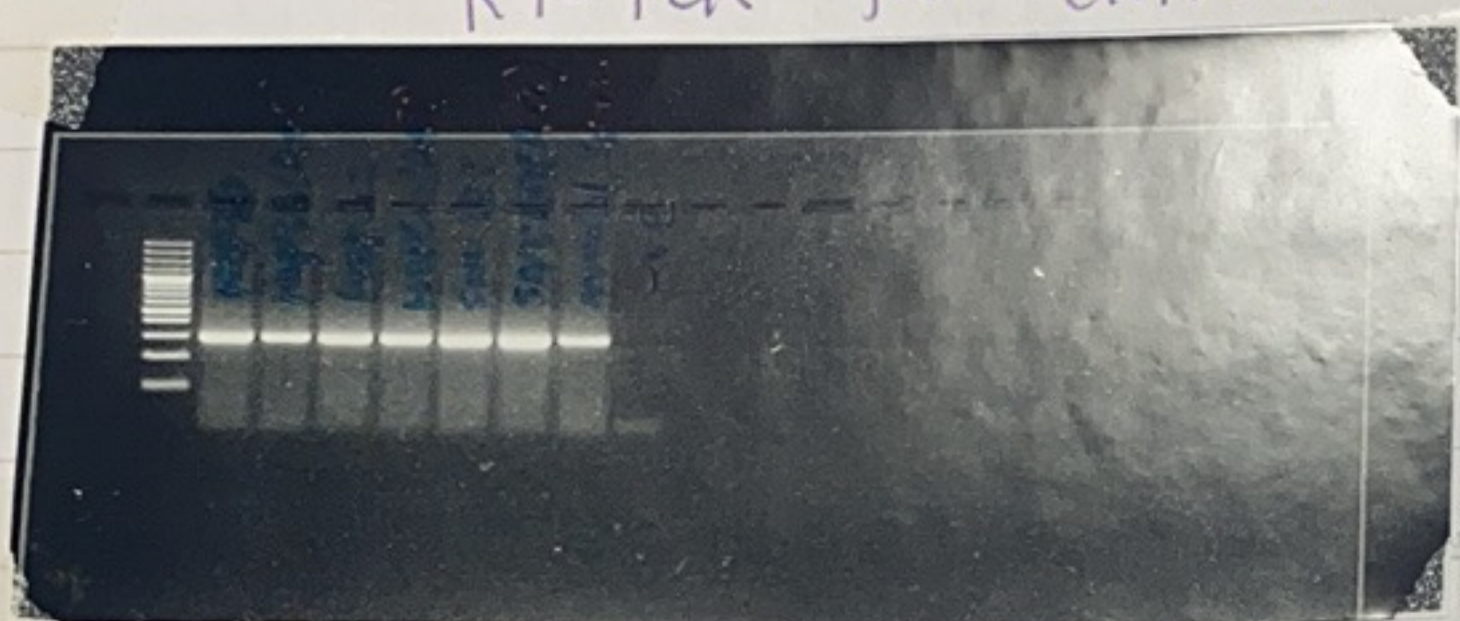

55°C      23 cycles  
27°C

m

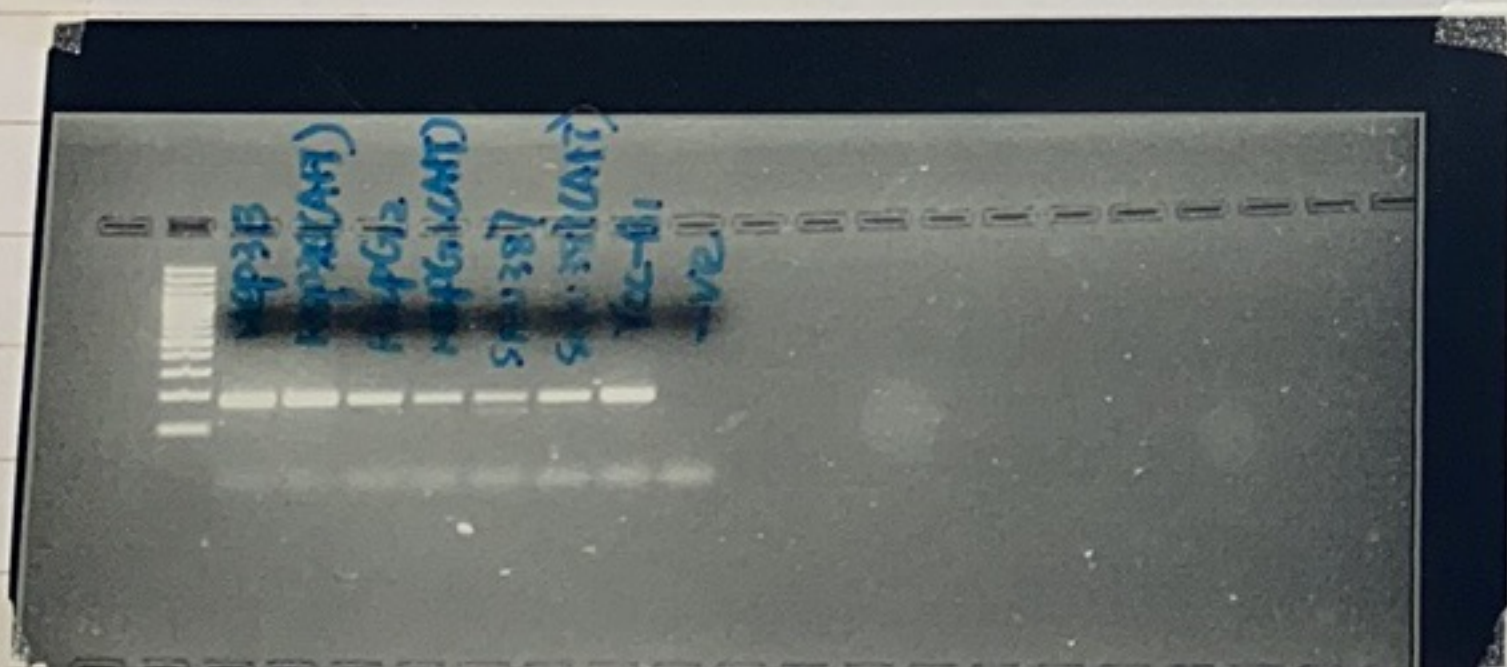

60°C      40 cycles  
2% Gel

V

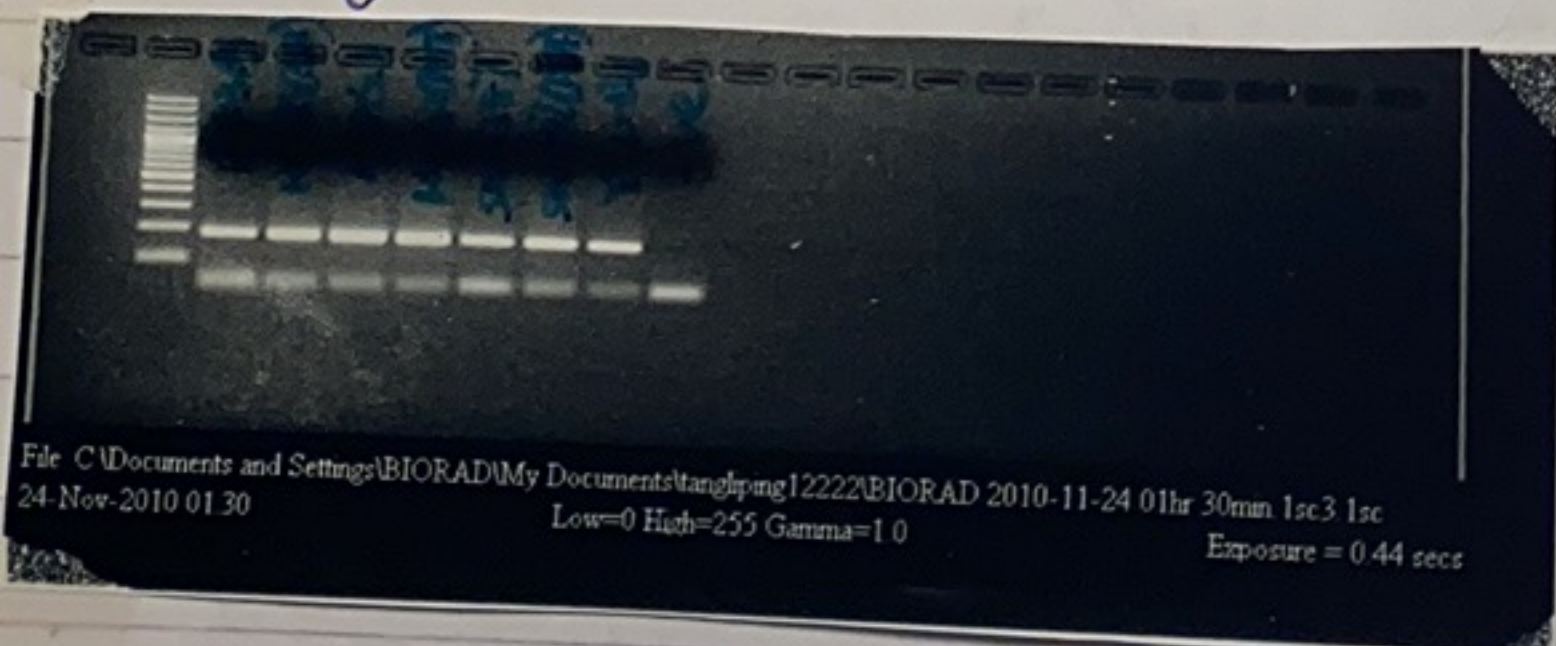

58°C      40 cycles  
2% Gel

Supplement: Original_Blots.zip [file Original_Blots.zip]

MAPK 10 Msp

five

PCR

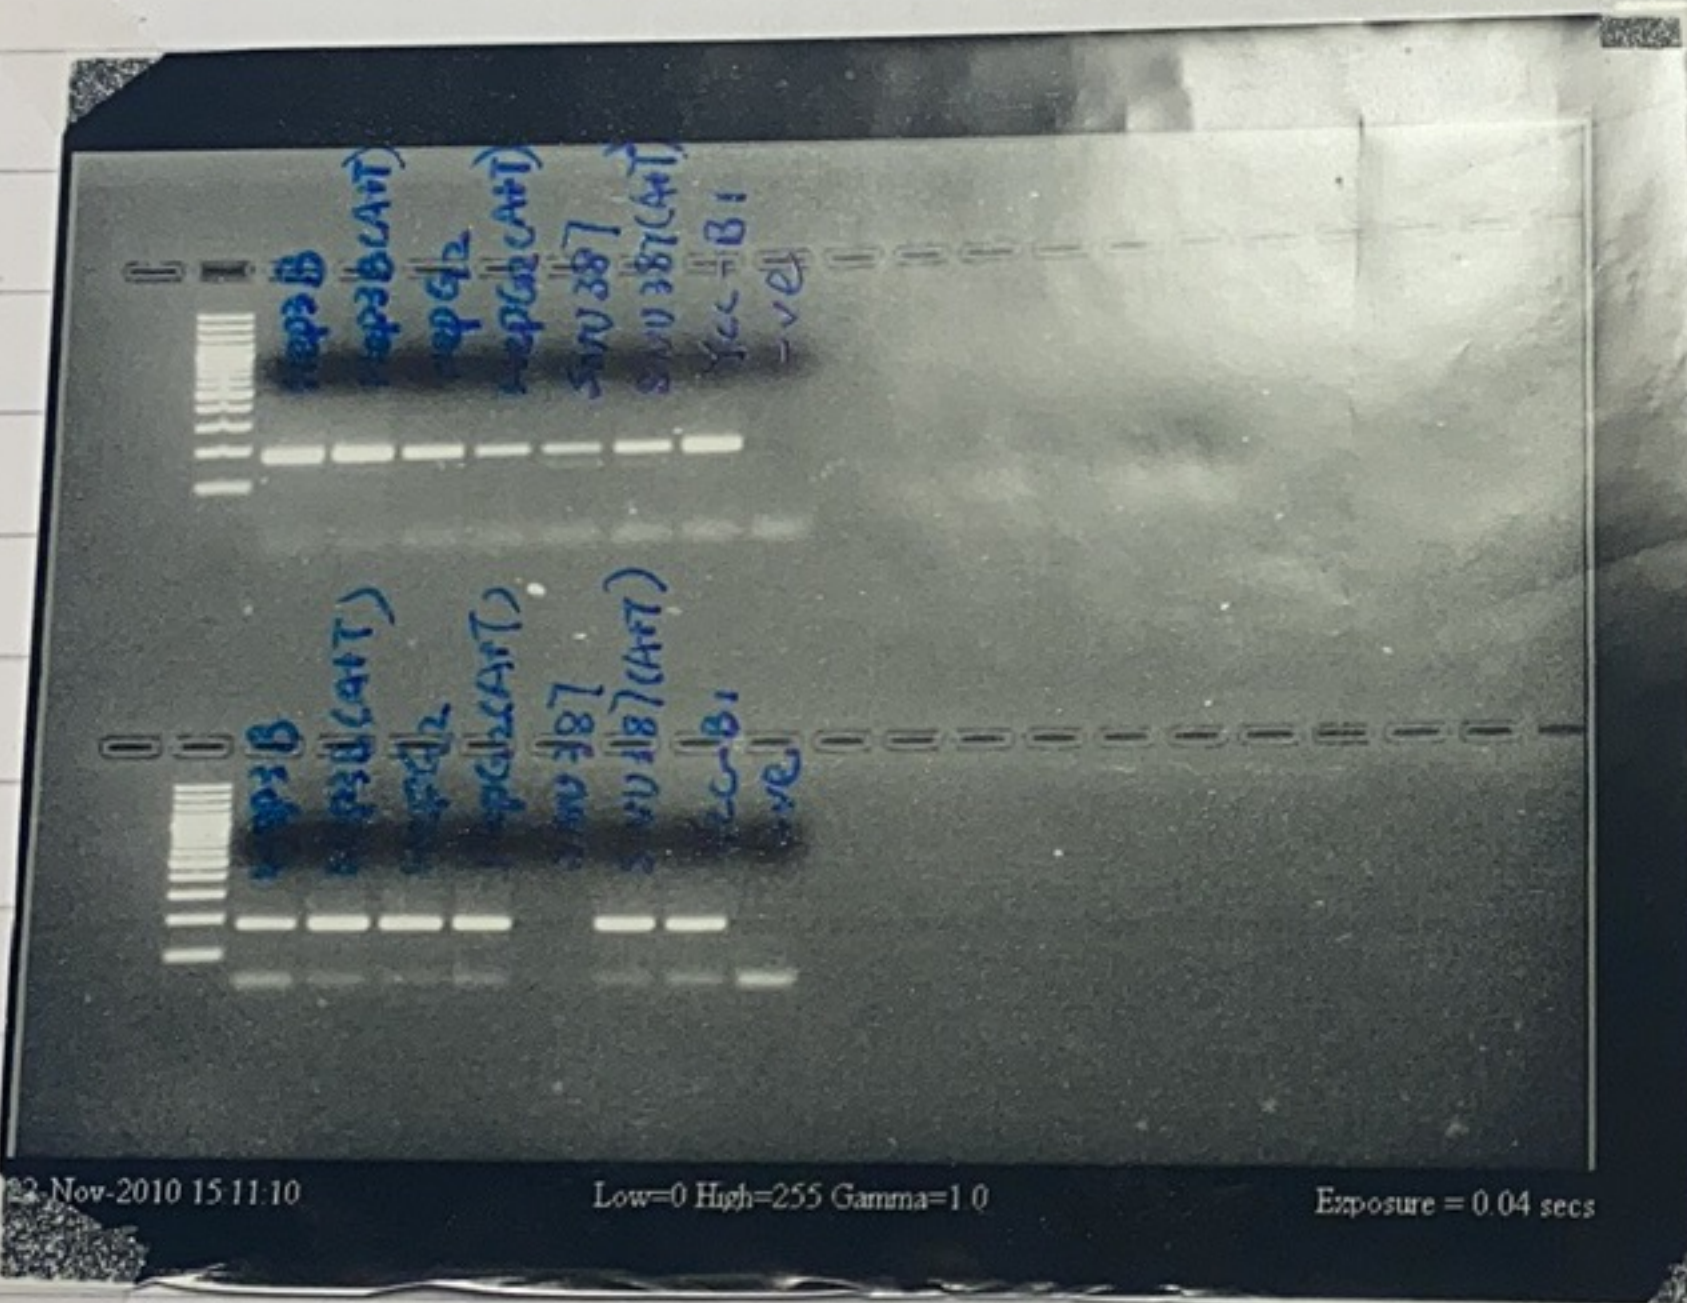

m: 60°C 40 cycles

U: 58°C 40 cycles

Supplement: Original_Blots.zip [file Original_Blots.zip]
